# Supplementary material for: Three dimensional high-performance micro-supercapacitors with switchable high power density and high energy density
Source: Royal Society of Chemistry journal article supplement (doi:10.1039/d3nr03122e), 2023-01-01
Supplement: d3nr03122e1.pdf [file d3nr03122e1.pdf]

## Three dimensional high-performance micro-supercapacitors with switchable high power density and high energy density

Kuangbing Wang,<sup>a</sup> Bangbang Nie,<sup>a,b,\*</sup> Ni Su,<sup>c</sup> Benkun Lv,<sup>d</sup> Huiqian Song,<sup>a</sup> Guochen Qi,<sup>a,b</sup> Yudong Zhang,<sup>a,b</sup> Jingjiang Qiu,<sup>a,b</sup> Ronghan Wei,<sup>a,b,e,\*</sup>

<sup>a</sup>School of Mechanics and Safety Engineering, Zhengzhou University, Zhengzhou 450001, China

<sup>b</sup>Engineering Technology Research Center of Henan Province for MEMS Manufacturing and Application, Zhengzhou University, Zhengzhou 450001, China

<sup>c</sup>College of Chemistry, Zhengzhou University, Zhengzhou 450001, China

<sup>d</sup>School of Electrical and Information Engineering, Zhengzhou University, Zhengzhou 450001, China

<sup>e</sup>Institute of Intelligent Sensing, Zhengzhou University, Zhengzhou 450001, China

Corresponding authors' e-mails: niebangbang@zzu.edu.cn; profwei@zzu.edu.cn

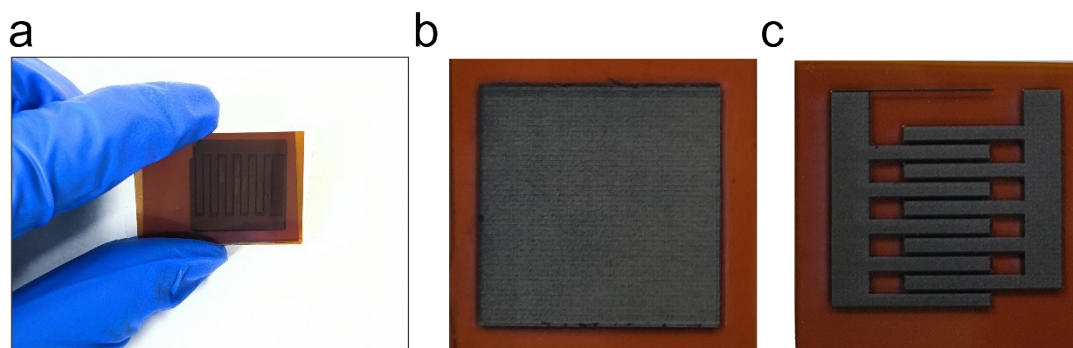

**Fig. S1.** (a) The image of switchable-MSC/MnO<sub>2</sub>. (b) Square electrode. (c) Interdigital electrode.

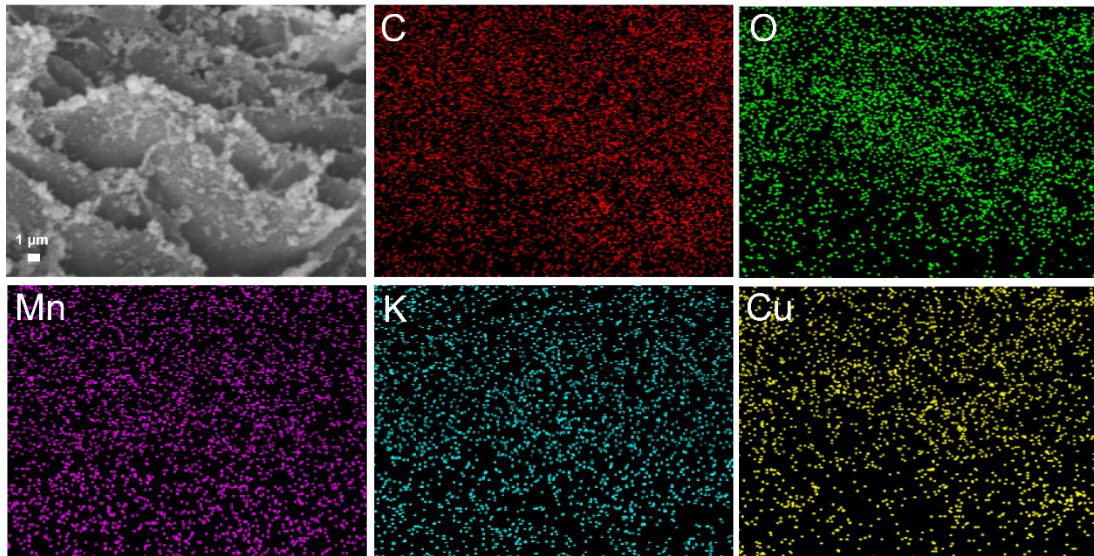

**Fig. S2.** The EDS image of LIG/MnO<sub>2</sub>.

Table S1 The overall spectrum of the distribution charts for LIG/MnO<sub>2</sub>.

| Element | Wt %  | Atomic percentage (%) |
|---------|-------|-----------------------|
| C       | 49.49 | 72.14                 |
| Mn      | 20.36 | 6.56                  |
| O       | 14.94 | 16.35                 |
| Cu      | 10.78 | 3.15                  |
| K       | 4.43  | 1.98                  |
| Total   | 100%  | 100%                  |

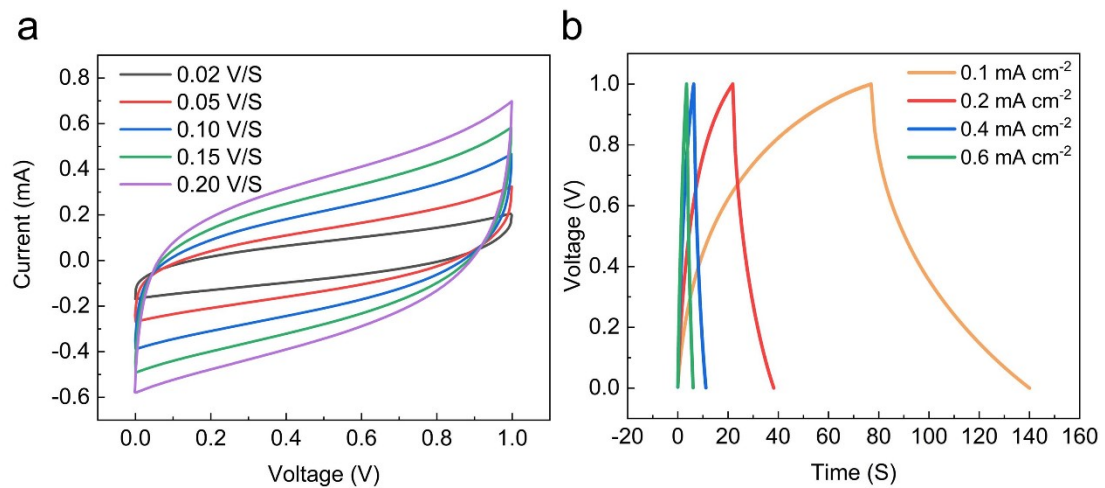

**Fig. S3.** Electrochemical characterizations of the interdigital-MSC. (a) CV curves under a scan rate of 0.02 to 0.2 V s<sup>-1</sup>. (b) GCD curves under a charge-discharge rate of 0.1 to 0.6 mA cm<sup>-2</sup>.

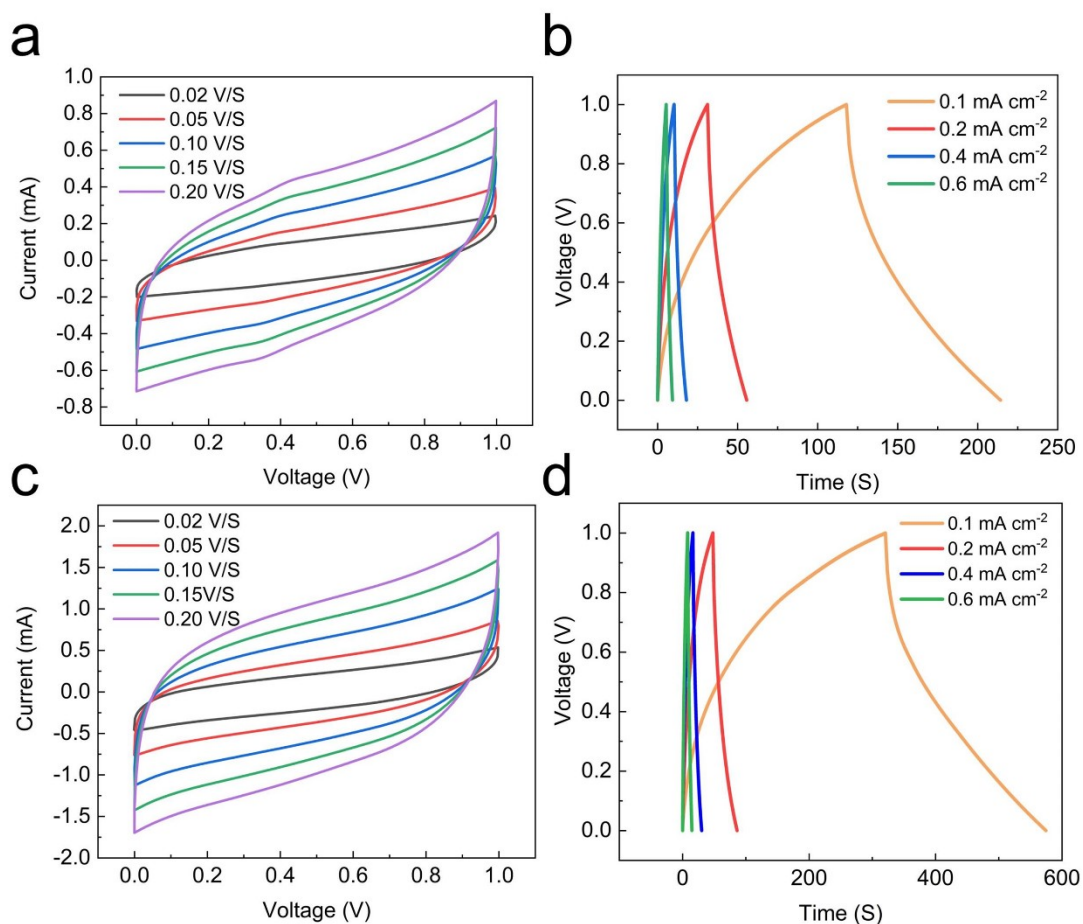

**Fig. S4.** Electrochemical characterizations of the switchable-MSC. (a, b) CV curves under a scan rate of 0.02 to 0.2 V s<sup>-1</sup> and GCD curves under a charge-discharge rate of 0.1 to 0.6 mA cm<sup>-2</sup> for the interdigital-MSC of the switchable-MSC. (c, d) CV curves under a scan rate of 0.02 to 0.2 V s<sup>-1</sup> and GCD curves under a charge-discharge rate of 0.1 to 0.6 mA cm<sup>-2</sup> for the sandwiched-MSC of the switchable-MSC.

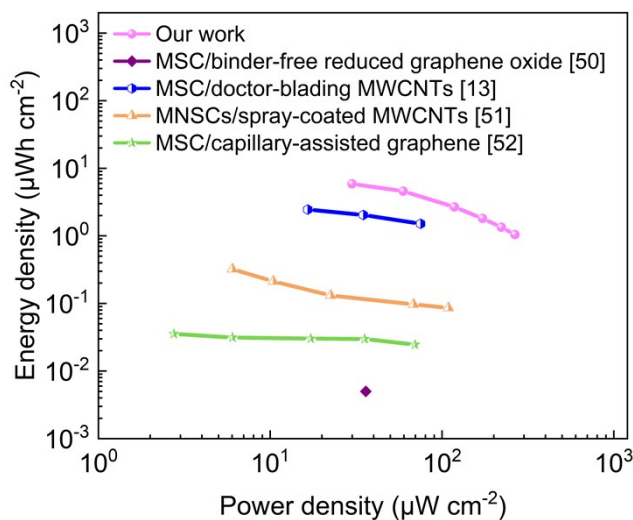

**Fig. S5.** Energy and power densities compared with most reported values for carbon-based MSCs.

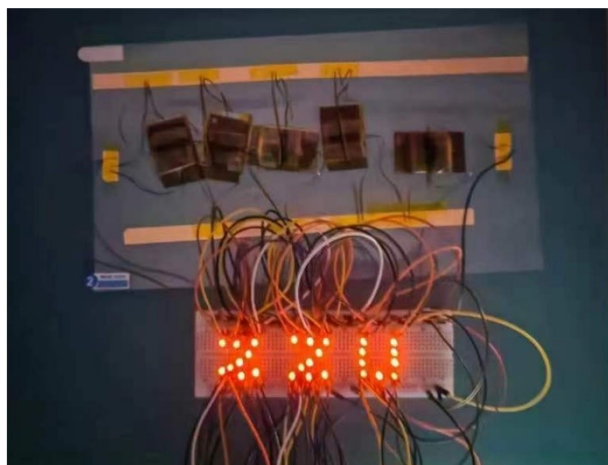

**Fig. S6.** Lighting up LED lights of 5 switchable-MSC/MnO<sub>2</sub> devices connected in series.
